# Supplementary material for: The interplay between magnetism and structure in Co/Fe-CdSe diluted magnetic quantum dots
Source: Royal Society of Chemistry journal article supplement (doi:10.1039/d4tc02713b), 2024-01-01
Supplement: d4tc02713b1.pdf [file d4tc02713b1.pdf]

## The interplay between magnetism and structure in Co/Fe-CdSe Diluted Magnetic Quantum Dots

Fatma Ibraheem<sup>1§</sup>, Esraa Gabrouny<sup>1§</sup>, Shaimaa Nadi<sup>2</sup>, Manal A. Mahdy<sup>3</sup>, Iman A. Mahdy<sup>1</sup>, J. Enrique Ortega<sup>4,5,6</sup>, Celia Rogero<sup>4,5</sup>, Martina Corso<sup>4,5\*</sup>, Afaf El-Sayed<sup>1,4,6\*\*</sup>

<sup>1</sup> Physics Department, Faculty of Science, Al-Azhar University (Girls Branch), Nasr City, 11753 Cairo, Egypt.

<sup>2</sup> Laser Science and its Interaction Department, National Institute of Laser Enhanced Science, Cairo University, 12613 Giza, Egypt.

<sup>3</sup> Physics Department, National Research Center (NRC), Dokki, Giza, Egypt.

<sup>4</sup> Centro de Física de Materiales CSIC/UPV-EHU (CFM), 20018, Donostia-San Sebastián, Spain.

<sup>5</sup> Donostia International Physics Center (DIPC), 20018 Donostia-San Sebastián, Spain.

<sup>6</sup> Universidad del País Vasco<sup>[SEP]</sup>Dpto. de Física Aplicada I,<sup>[SEP]</sup>20018 Donostia-San Sebastián, Spain.

§ Those authors contributed equally to this article.

\* Corresponding Author: Martina Corso: [martina.corso@ehu.eus](mailto:martina.corso@ehu.eus);  
[martina.corso@csic.es](mailto:martina.corso@csic.es)

Centro de Física de Materiales CSIC/UPV-EHU (CFM), 20018, Donostia-San Sebastián, Spain.

Donostia International Physics Center (DIPC), 20018 Donostia-San Sebastián, Spain.

\*\* Corresponding Author: Afaf El-Sayed: [afaf.elsayed@azhar.edu.eg](mailto:afaf.elsayed@azhar.edu.eg);  
[afaf.elsayed@ehu.eus](mailto:afaf.elsayed@ehu.eus)

Physics Department, Faculty of Science, Al-Azhar University (Girls Branch), Nasr City, E-11753 Cairo, Egypt.

Universidad del País Vasco<sup>[SEP]</sup>Dpto. de Física Aplicada I,<sup>[SEP]</sup>20018 Donostia-San Sebastián, Spain.

## **SI. 1 Preparation of dithiocarbazate acid (DTC complex)**

The DTC complex is prepared by stirring 10 mL of hydrazine hydrate [(N<sub>2</sub>H<sub>4</sub>.xH<sub>2</sub>O), Sigma-Aldrich] with 15 mL carbon disulphide [(CS<sub>2</sub>), Sigma-Aldrich 99%] in a canonical flask using an ice bath. A 5 mL of 0.5 M sodium hydroxide [(NaOH), Sigma-Aldrich 97%] is added. To ensure the solubility of the CS<sub>2</sub> into the N<sub>2</sub>H<sub>4</sub>, a suitable amount of methanol is added. The stirring process lasts for about 2 h until the solution turns into a yellow color, declaring the formation of sodium dithiocarbazate (CH<sub>3</sub>NaN<sub>2</sub>S<sub>2</sub>). At the last stage, we add a few drops of glacial acetic acid [(CH<sub>3</sub>CO<sub>2</sub>H), Sigma-Aldrich] until a white powder of dithiocarbazate acid (DTC complex) is precipitated. The powder is filtered and washed several times with deionized water, then dried at 80 °C.

## SI. 2 The optical absorption of DMQDs during the early stages of growth

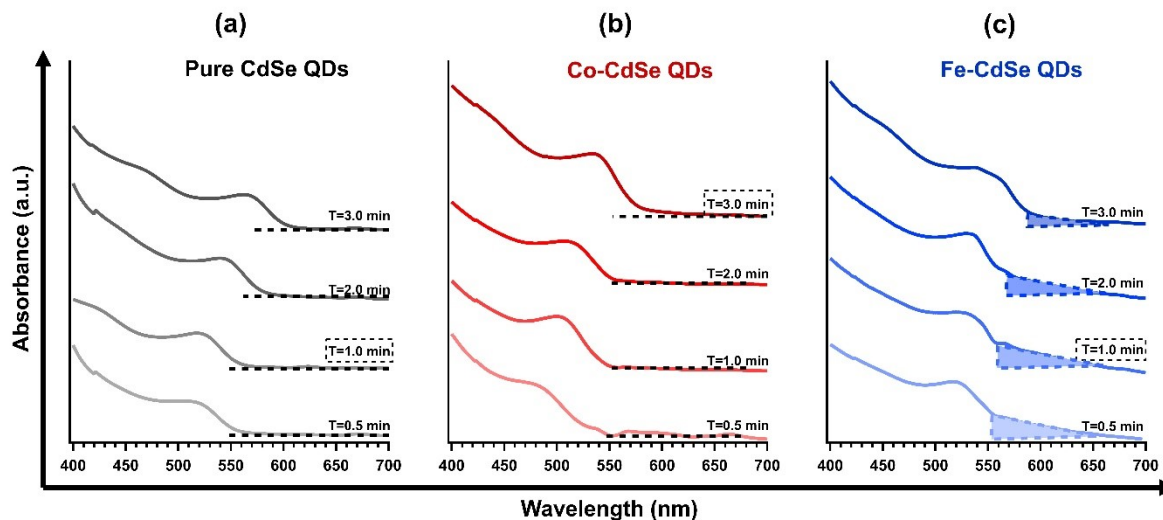

**Figure SI-1:** Optical absorption spectra for: (a) pure, (b) Co-doped, and (c) Fe-doped CdSe QDs at the early growth stages.

Focusing on the early stages of the growth process for pure and Co/Fe-doped CdSe QDs, we can see that by comparison; the Fe-doped CdSe QDs are showing some optical transition in the wavelength region of 650 – 570 nm, i.e. 1.90 – 2.18 eV, see the shaded triangles in Figure SI-1. These optical transitions are not observed in pure or the Co-doped CdSe QDs. Thus, they most probably belong to the FeSe optical transition [1]. The intensity of these transitions decreases with growth time since the main CdSe QDs band gaps are shifting towards longer wavelengths and/or the possibility that the FeSe structure is only evolving inside the core of the CdSe QDs. More explanations can be found in the original article text.

### SI. 3 The proof of the DTC decomposition at the early stages of growth

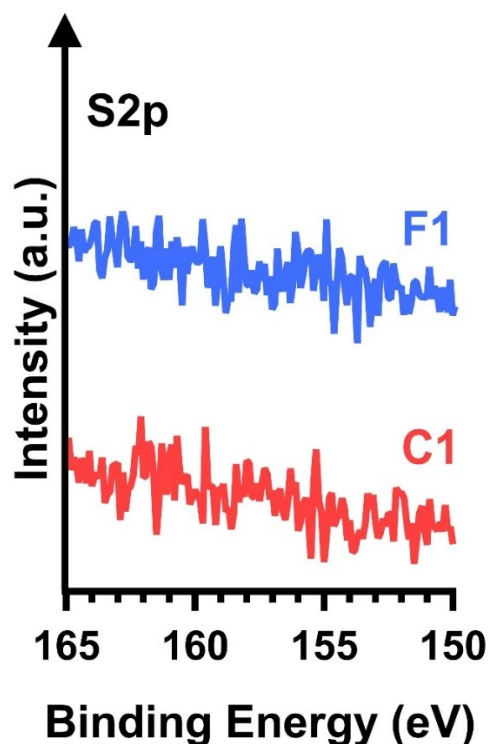

**Figure SI-2:** XPS spectra of S2p core levels for small-size Co/Fe-doped CdSe QD samples, i.e., C1 and F1, respectively.

To ensure the inclusion of only the transition metal ions during the doping process without the inclusion of the dithiocarbazate (DTC,  $\text{CH}_3\text{N}_2\text{S}_2$ ) salt, we measured the S2p core level for both doped systems at the early stage of the growth process, see Figure SI-2. There is no emission from S2p core levels of the DSC salt in small-size Co/Fe-doped CdSe QD samples, i.e., C1 and F1, respectively. This further proves the successful doping process using the Co/Fe-DTC salts in the organometallic method.

---

[1] Hou, B.; Benito-Alifonso, D.; Webster, R.F.; Cherns, D.; Galan, M.C.; Fermín, D.J. Synthetic Mechanism Studies of Iron Selenides: An Emerging Class of Materials for Electrocatalysis. *Catalysts* 2021, 11, 681. <https://doi.org/10.3390/catal11060681>
